# Supplementary material
Source: HighWire-hosted journal article supplement (https://erj.ersjournals.com/content/55/5/1902340)
Supplement: inline-supplementary-material-1 [file inline-supplementary-material-1.pdf]

**Supplemental table 1: Histopathological features of lung biopsy and explants.**

|                                                                                                                                                                                                                                              | <b>Patient 12</b><br>(surgical biopsy)                                                  | <b>Patient 3</b><br>(lung explant) | <b>Patient 20</b><br>(lung explant) |
|----------------------------------------------------------------------------------------------------------------------------------------------------------------------------------------------------------------------------------------------|-----------------------------------------------------------------------------------------|------------------------------------|-------------------------------------|
| <b>TBX4 mutation (nucleotide change)</b>                                                                                                                                                                                                     | c.(549+1_550-1)_(702+1_703-1)del                                                        | c.231G>A                           | c.143dup                            |
| <b>Lung macroscopy</b>                                                                                                                                                                                                                       | NA                                                                                      | Small size                         | Small size                          |
| <b>Alveolar structure:</b><br>Alveolar septa<br>Emphysematous changes<br>Interstitial fibrosis and inflammation                                                                                                                              | Thin alveolar septa<br>Yes<br>Patchy, peribronchiolar and perivascular                  |                                    |                                     |
| <b>Bronchial anomalies</b>                                                                                                                                                                                                                   | Peri-bronchial inflammation with cholesterol clefts<br>and hypertrophy of smooth muscle |                                    |                                     |
| <b>Vascular remodeling:</b><br>- Small pulmonary arteries (<500µm)<br><i>Intimal and medial thickening</i><br><i>Plexiform lesions</i><br>- Large (elastic-type pulmonary arteries)<br><i>Intimal thickening</i><br><i>Organized thrombi</i> | Yes<br>No                                                                               | Yes<br>Numerous                    | Yes<br>Numerous                     |
|                                                                                                                                                                                                                                              | NA                                                                                      | Mild<br>No                         | Mild<br>Yes                         |

NA: not available
