# Supplementary material
Source: HighWire-hosted journal article supplement (https://erj.ersjournals.com/content/55/5/1902340)
Supplement: inline-supplementary-material-2 [file inline-supplementary-material-2.pdf]

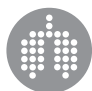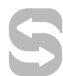

SHAREABLE PDF

# Phenotype and outcome of pulmonary arterial hypertension patients carrying a *TBX4* mutation

Pierre Thoré <sup>1,2,3,16</sup>, Barbara Girerd<sup>1,4,5,16</sup>, Xavier Jaïs<sup>1,4,5</sup>, Laurent Savale <sup>1,4,5</sup>, Maria-Rosa Ghigna <sup>5,6</sup>, Mélanie Eyries<sup>7</sup>, Marilyne Levy<sup>8</sup>, Caroline Ovaert<sup>9</sup>, Amélie Servettaz <sup>10</sup>, Anne Guillaumot<sup>2</sup>, Claire Dauphin<sup>11</sup>, Céline Chabanne<sup>12</sup>, Emmanuel Boiffard<sup>13</sup>, Vincent Cottin <sup>14</sup>, Frédéric Perros<sup>1,4,5</sup>, Gérald Simonneau<sup>1,4,5</sup>, Olivier Sitbon <sup>1,4,5</sup>, Florent Soubrier <sup>6</sup>, Damien Bonnet<sup>8</sup>, Martine Remy-Jardin<sup>15</sup>, Ari Chaouat <sup>2,3</sup>, Marc Humbert <sup>1,4,5</sup> and David Montani <sup>1,4,5</sup>

**Affiliations:** <sup>1</sup>Assistance Publique-Hôpitaux de Paris, Dept of Respiratory and Intensive Care Medicine, Pulmonary Hypertension National Referral Center, Hôpital Bicêtre, Le Kremlin-Bicêtre, France. <sup>2</sup>Centre Hospitalier Régional Universitaire de Nancy, Département de Pneumologie, Hôpital de Brabois, Vandœuvre-lès-Nancy, France. <sup>3</sup>Inserm UMR\_S 1116, Défaillance Cardiovasculaire Aigüe et Chronique, Faculté de Médecine de Nancy, Université de Lorraine, Nancy, France. <sup>4</sup>School of Medicine, Université Paris-Saclay, Le Kremlin-Bicêtre, France. <sup>5</sup>INSERM UMR\_S 999, Pulmonary Hypertension: Pathophysiology and Novel Therapies, Hôpital Marie Lannelongue, Le Plessis-Robinson, France. <sup>6</sup>Service d'Anatomopathologie, Hôpital Marie Lannelongue, Le Plessis Robinson, France. <sup>7</sup>Assistance Publique-Hôpitaux de Paris, UF d'Oncogénétique et Angiogénétique Moléculaire, Département de Génétique, Groupement Hospitalier Pitié Salpêtrière-Charles Foix, Hôpital Pitié Salpêtrière, Paris, France. <sup>8</sup>Assistance Publique-Hôpitaux de Paris, Service de Cardiologie Pédiatrique, Hôpital Necker Enfants Malades, Paris, France. <sup>9</sup>Assistance Publique-Hôpitaux de Marseille, Service Médico-Chirurgical de Cardiologie Pédiatrique et Congénitale, Hôpital de la Timone, Marseille, France. <sup>10</sup>Centre Hospitalier Universitaire de Reims, Service de Médecine Interne, Maladies Infectieuses et Immunologie Clinique, Hôpital Robert Debré, Reims, France. <sup>11</sup>Centre Hospitalier Universitaire de Clermont-Ferrand, Service de Cardiologie et Maladies Vasculaires, Hôpital Gabriel Montpied, Clermont-Ferrand, France. <sup>12</sup>Centre Hospitalier Universitaire de Rennes, Service de Cardiologie et Maladies Vasculaires, Centre Cardio-Pneumologique, Rennes, France. <sup>13</sup>Centre Hospitalier Départemental de Vendée, Service de Cardiologie, Hôpital de La Roche sur Yon, La Roche sur Yon, France. <sup>14</sup>Centre Hospitalier Universitaire de Lyon HCL, Service de Pneumologie, Centre de Référence des Maladies Pulmonaires Rares, Groupement Hospitalier Est, Hôpital Louis Pradel, Bron, France. <sup>15</sup>Centre Hospitalier Universitaire de Lille, Service d'Imagerie Thoracique, Hôpital Albert Calmette, Lille, France. <sup>16</sup>These authors contributed equally.

**Correspondence:** David Montani, Service de Pneumologie, Hôpital Bicêtre, 78, Rue du général Leclerc, 94270 Le Kremlin-Bicêtre, France. E-mail: david.montani@aphp.fr

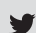

@ERSpublications

PAH due to *TBX4* mutations may occur with or without skeletal abnormalities across a broad age range from birth to late adulthood. PAH is usually severe and associated with parenchymal abnormalities, alveolar and pulmonary vascular remodelling, and low  $D_{LCO}$ . <http://bit.ly/38jM37U>

**Cite this article as:** Thoré P, Girerd B, Jaïs X, *et al.* Phenotype and outcome of pulmonary arterial hypertension patients carrying a *TBX4* mutation. *Eur Respir J* 2020; 55: 1902340 [https://doi.org/10.1183/13993003.02340-2019].

This single-page version can be shared freely online.

## ABSTRACT

**Introduction:** *TBX4* mutation causes small patella syndrome (SPS) and/or pulmonary arterial hypertension (PAH). The characteristics and outcomes of PAH associated with *TBX4* mutations are largely unknown.

Copyright ©ERS 2020

**Methods:** We report the clinical, functional, radiologic, histologic and haemodynamic characteristics and outcomes of heritable PAH patients carrying a *TBX4* mutation from the French pulmonary hypertension (PH) network.

**Results:** 20 patients were identified in 17 families. They were characterised by a median age at diagnosis of 29 years (0–76 years) and a female to male ratio of three. Most of the patients (70%) were in New York Heart Association (NYHA) functional class III or IV with a severe haemodynamic impairment (median pulmonary vascular resistance (PVR) of 13.6 (6.2–41.8) Wood units). Skeletal signs of SPS were present in 80% of cases. Half of the patients had mild restrictive or obstructive limitation and diffusing capacity of the lung for carbon monoxide ( $D_{LCO}$ ) was decreased in all patients. High-resolution computed tomography (HRCT) showed bronchial abnormalities, peri-bronchial cysts, mosaic distribution and mediastinal lymphadenopathies. PAH therapy was associated with significant clinical improvement. At follow-up (median 76 months), two patients had died and two had undergone lung transplantation. One-year, three-year and five-year event-free survival rates were 100%, 94% and 83%, respectively. Histologic examination of explanted lungs revealed alveolar growth abnormalities, major pulmonary vascular remodelling similar to that observed in idiopathic pulmonary arterial hypertension (IPAH) and accumulation of cholesterol crystals within the lung parenchyma.

**Conclusion:** PAH due to *TBX4* mutations may occur with or without skeletal abnormalities across a broad age range from birth to late adulthood. PAH is usually severe and associated with bronchial and parenchymal abnormalities.
